# Supplementary material for: Dual Targeting of Apoptotic and Signaling Pathways in T-Lineage Acute Lymphoblastic Leukemia
Source: PubMed Central journal article supplement — Clin Cancer Res. 2023 Jun 26;29(16):3151–61. doi: 10.1158/1078-0432.CCR-23-0415 (PMC10425730; doi:10.1158/1078-0432.ccr-23-0415), 2023-06-26
Supplement: ccr-23-0415_supplementary_figures_1-9_suppfs1-9.pdf [file ccr-23-0415_supplementary_figures_1-9_suppfs1-9.pdf]

Supplementary Figure 1

A

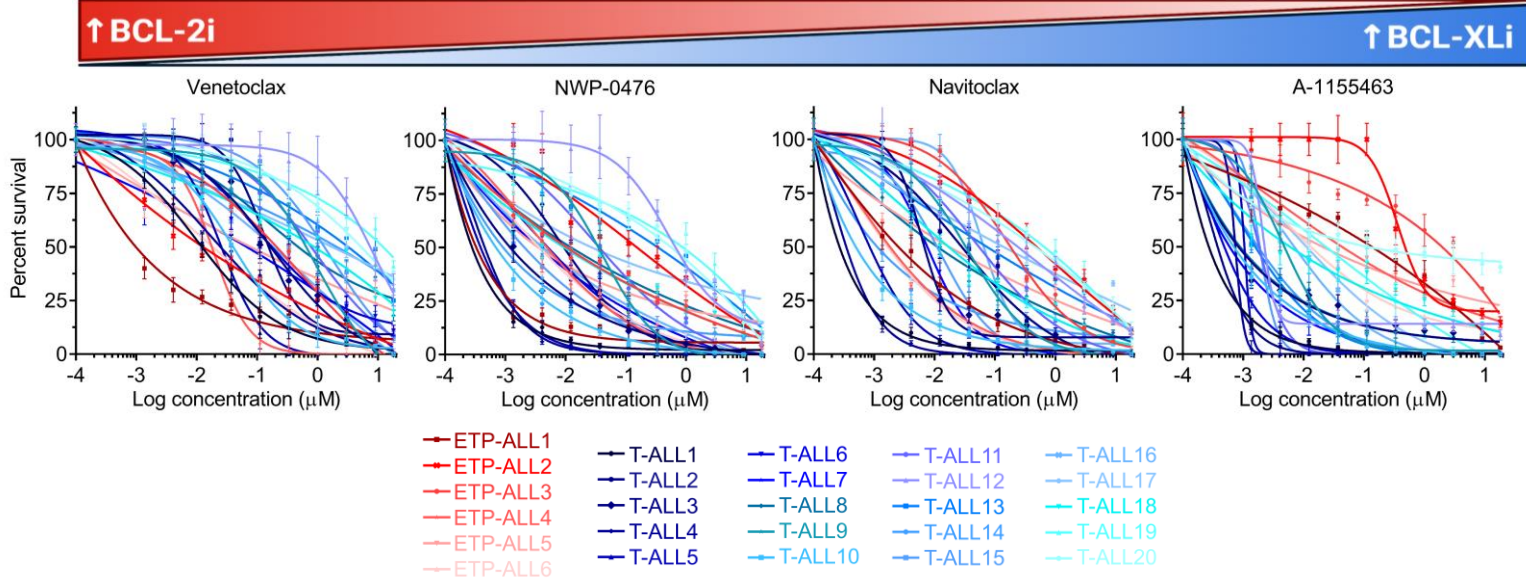

B

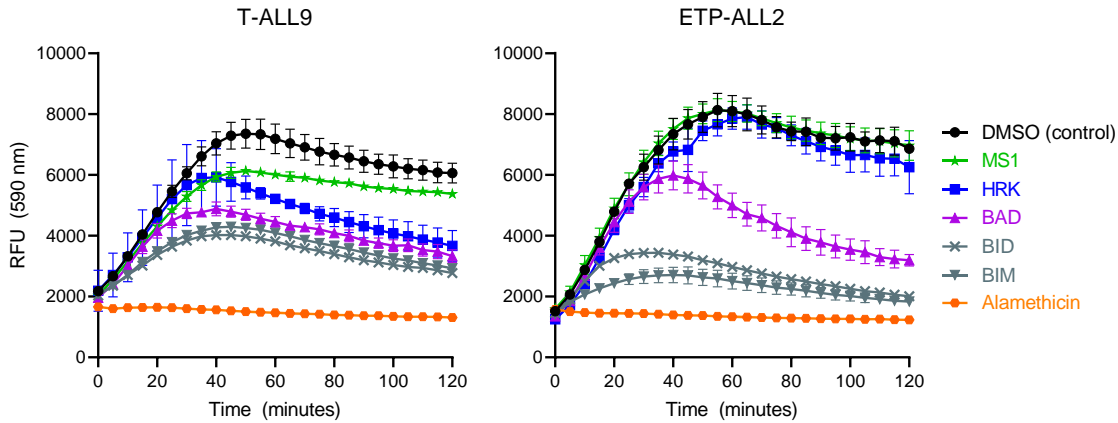

(A) Curves showing the viability of T-ALL primary cells treated with BH3 mimetics. (B) Mitochondrial polarization curves were obtained with BH3 profiling of T-lineage ALL primary cells.

**Supplementary Figure 2**

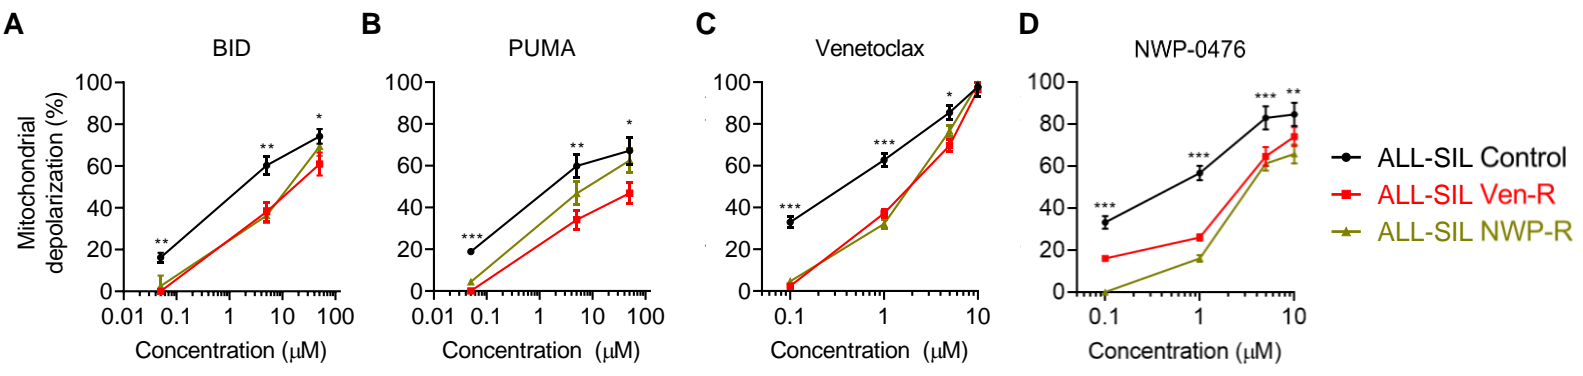

BH3 profiling of ALL-SIL control, venetoclax-resistant (ven-R), and NWP-0476-resistant (NWP-R) cells, showing mitochondrial depolarization with titration assays for BID (A), PUMA (B), venetoclax (C), and NWP-0476 (D).

# Supplementary Figure 3

**A**

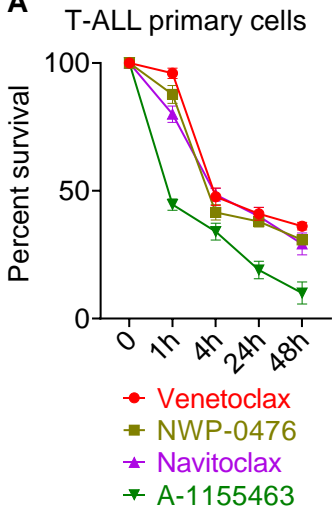

**B**

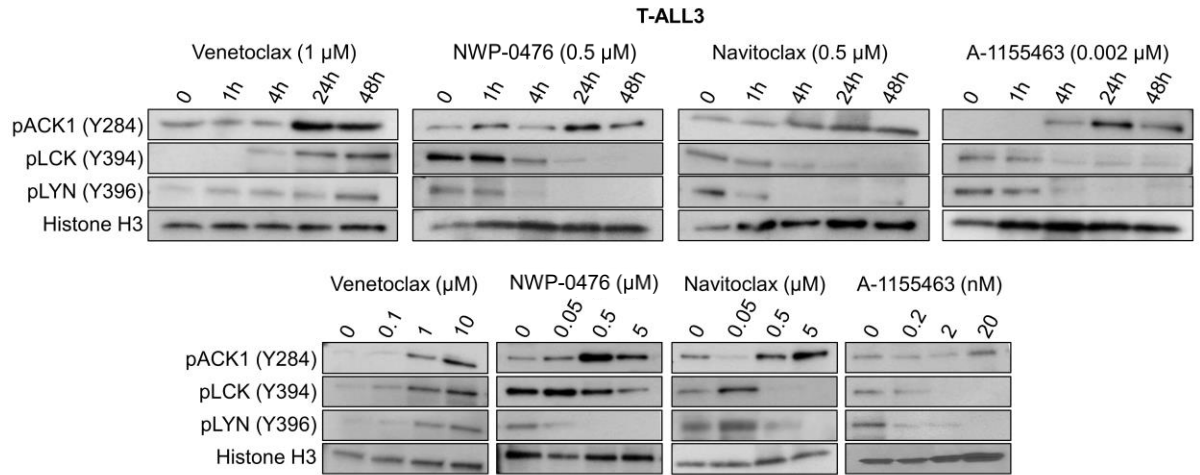

**C**

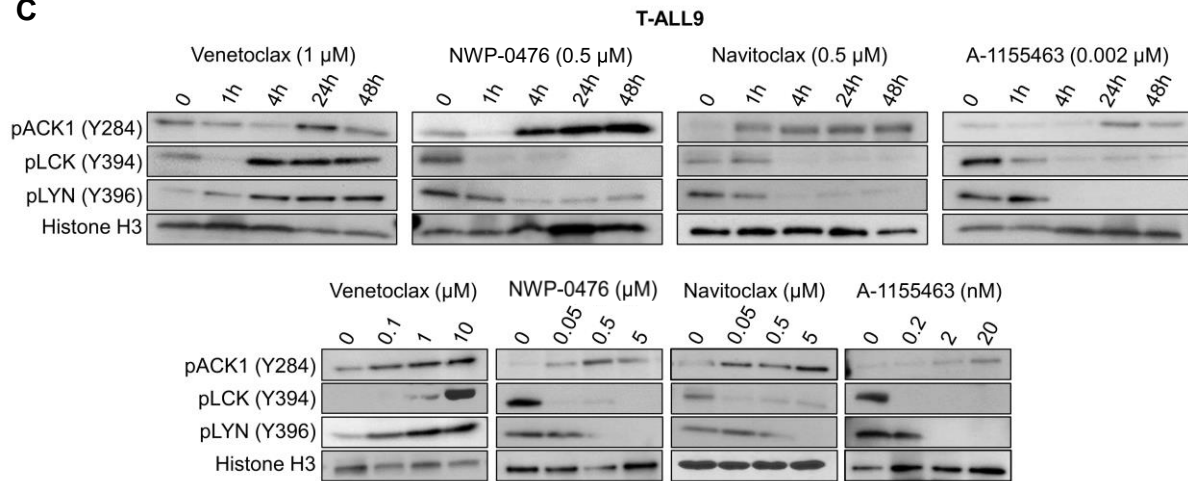

**D**

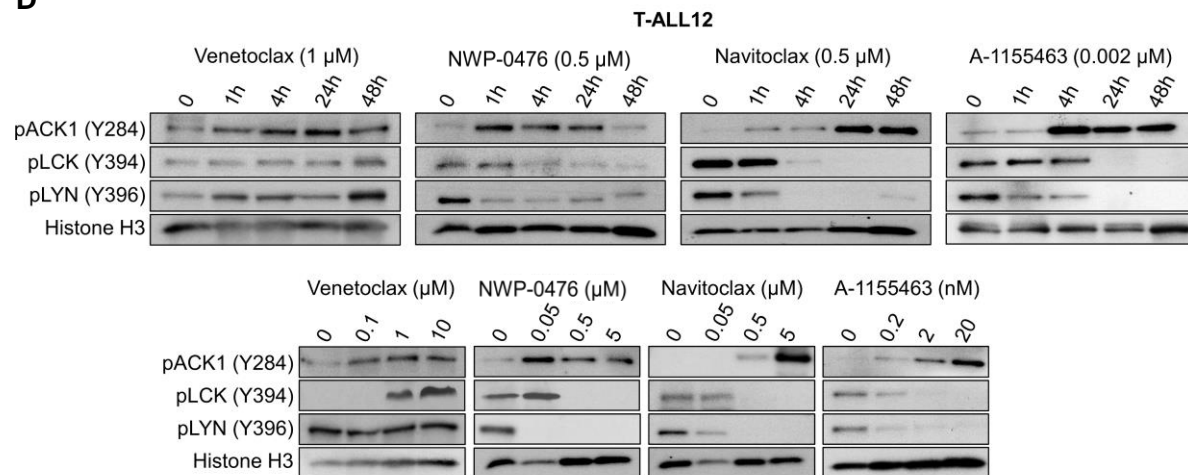

**(A)** Percent survival curves for the T-ALL primary cells (T-ALL3, T-ALL9 and T-ALL12) treated with venetoclax, NWP-0476, navitoclax and A-1155463 over 48 hours. **(B, C, D)** Immunoblots showing time-dependent and dose-dependent changes in pACK, pLCK, and pLYN levels of T-ALL primary cells treated with BH3 mimetics.

**Supplementary Figure 4**

**A**

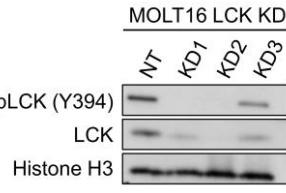

**B**

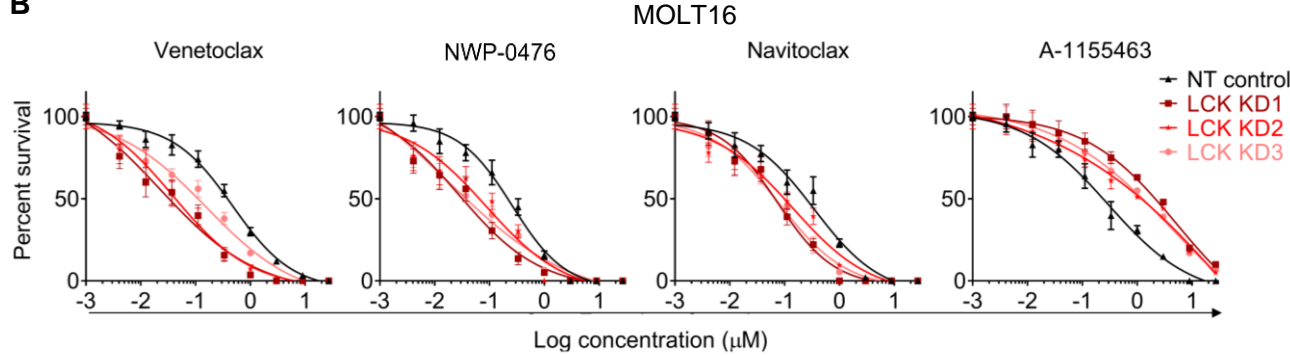

**C**

MOLT4 LCK KD IC<sub>50</sub> values (µM)

|                   | NT control | KD1  | KD2   | KD3   |
|-------------------|------------|------|-------|-------|
| <b>Venetoclax</b> | 4.03       | 0.66 | 0.92  | 1.124 |
| <b>NWP-0476</b>   | 1.6        | 0.67 | 0.19  | 0.09  |
| <b>Navitoclax</b> | 0.31       | 0.06 | 0.013 | 0.002 |
| <b>A-1155463</b>  | 0.012      | 0.1  | 0.19  | 0.14  |

**D**

MOLT16 LCK KD IC<sub>50</sub> values (µM)

|                   | NT control | KD1  | KD2  | KD3  |
|-------------------|------------|------|------|------|
| <b>Venetoclax</b> | 0.47       | 0.02 | 0.03 | 0.15 |
| <b>NWP-0476</b>   | 0.26       | 0.02 | 0.08 | 0.01 |
| <b>Navitoclax</b> | 0.34       | 0.07 | 0.14 | 0.08 |
| <b>A-1155463</b>  | 0.29       | 2.9  | 1.1  | 1.9  |

**(A)** Immunoblot showing LCK knockdown (KD) in MOLT16 T-ALL cell line, using three non-overlapping shRNA constructs. **(B)** Curves showing viability of MOLT16 non-targeting (NT) control and LCK KD cells treated with BH3 mimetics. **(C, D)** Tables showing IC<sub>50</sub> values for MOLT4 and MOLT16 NT control and LCK KD cells treated with BH3 mimetics.

**Supplementary Figure 5**

**A**

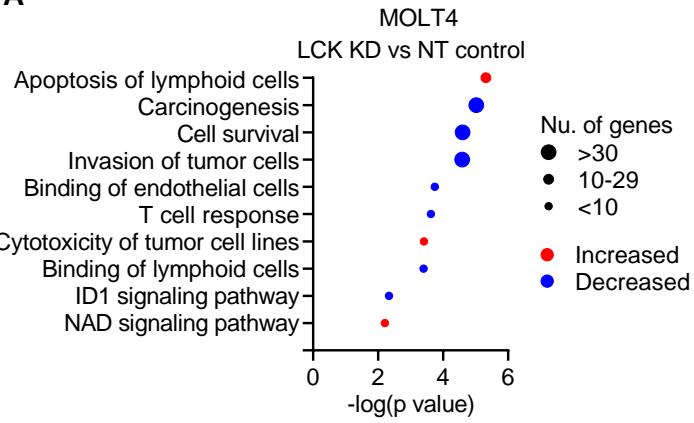

**B**

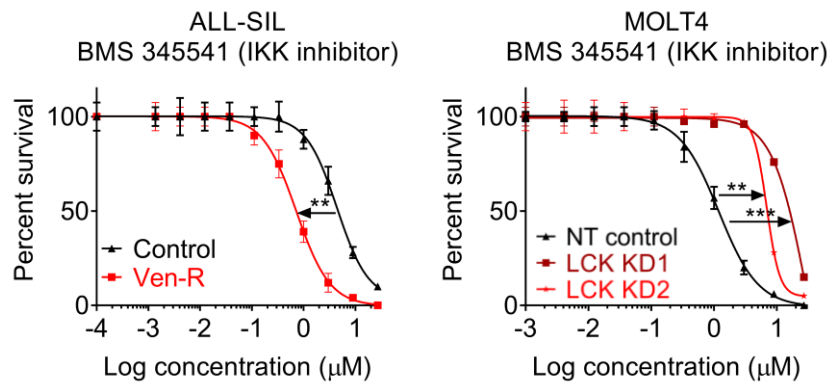

**C**

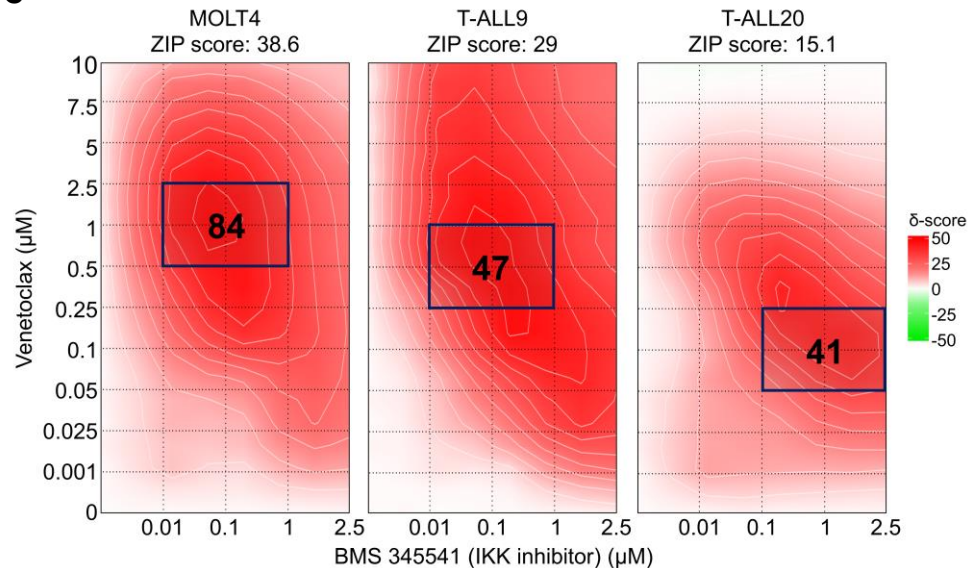

**D**

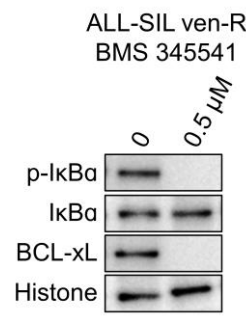

**(A)** Ingenuity pathway analysis results showing pathways that are altered with LCK knockdown (KD) in MOLT4 T-ALL cell line. **(B)** Curves showing viability of ALL-SIL control vs venetoclax-resistant (ven-R), and MOLT4 non-targeting (NT) control vs LCK KD cells treated with the IKK inhibitor, BMS 345541. **(C)** ZIP synergy plots for MOLT4 cell line and T-ALL primary cells treated with venetoclax and BMS 345541. **(D)** Immunoblots showing p-IkBa, IkBa, and BCL-xL levels in BMS 345541-treated ALL-SIL ven-R cells. \* $p < 0.05$ , \*\* $p < 0.01$ , \*\*\* $p < 0.001$

# Supplementary Figure 6

**A**

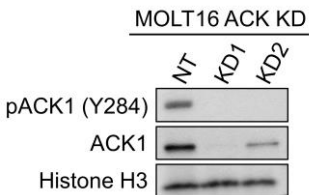

**B**

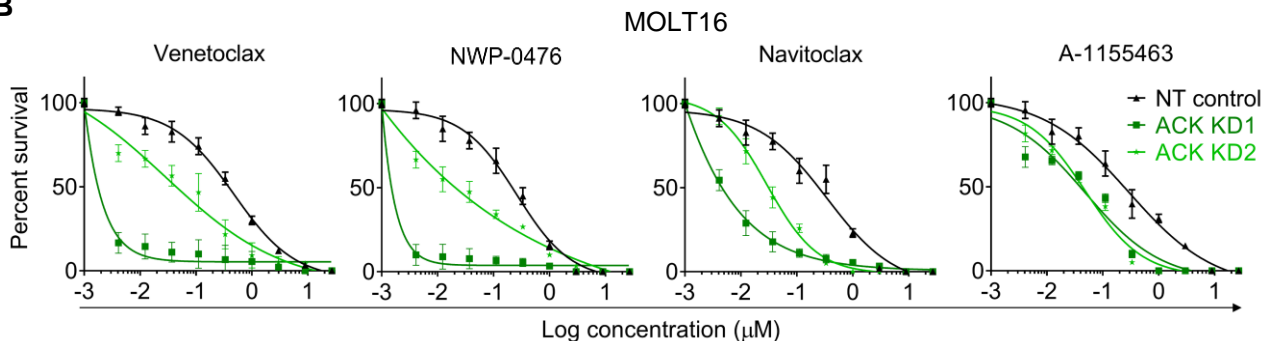

**C**

MOLT4 ACK KD  $\text{IC}_{50}$  values with 95% CI ( $\mu\text{M}$ )

|                   | NT control             | KD1                        | KD2                          |
|-------------------|------------------------|----------------------------|------------------------------|
| <b>Venetoclax</b> | 4.35<br>(3.2 – 5.1)    | 1.1<br>(0.9 – 1.3)         | 1.56<br>(1.4 – 1.7)          |
| <b>NWP-0476</b>   | 1.01<br>(0.8 – 1.4)    | 0.22<br>(0.1 – 0.3)        | 0.09<br>(0.04 – 0.12)        |
| <b>Navitoclax</b> | 0.38<br>(0.2 – 0.5)    | 0.024<br>(0.02 – 0.05)     | 0.021<br>(0.01 – 0.03)       |
| <b>A-1155463</b>  | 0.014<br>(0.01 – 0.02) | 0.00017<br>(0.0001–0.0003) | 0.000078<br>(0.00001–0.0001) |

**D**

MOLT16 ACK KD  $\text{IC}_{50}$  values ( $\mu\text{M}$ )

|                   | NT control         | KD1                   | KD2                |
|-------------------|--------------------|-----------------------|--------------------|
| <b>Venetoclax</b> | 0.47 (0.3 – 0.62)  | 0.003 (0.001–0.004)   | 0.02 (0.01 – 0.03) |
| <b>NWP-0476</b>   | 0.26 (0.1 – 0.4)   | 0.002 (0.001 – 0.005) | 0.03 (0.01 – 0.05) |
| <b>Navitoclax</b> | 0.34 (0.28 – 0.51) | 0.005 (0.001 – 0.01)  | 0.02 (0.01 – 0.04) |
| <b>A-1155463</b>  | 0.29 (0.14 – 0.42) | 0.04 (0.01 – 0.9)     | 0.04 (0.02 – 0.07) |

**E**

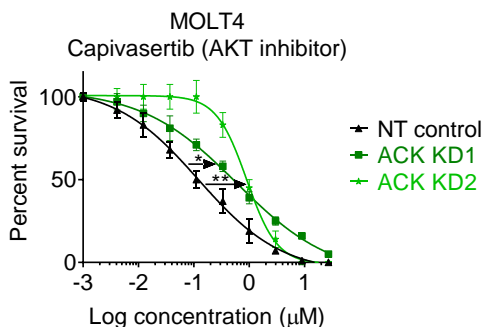

**F**

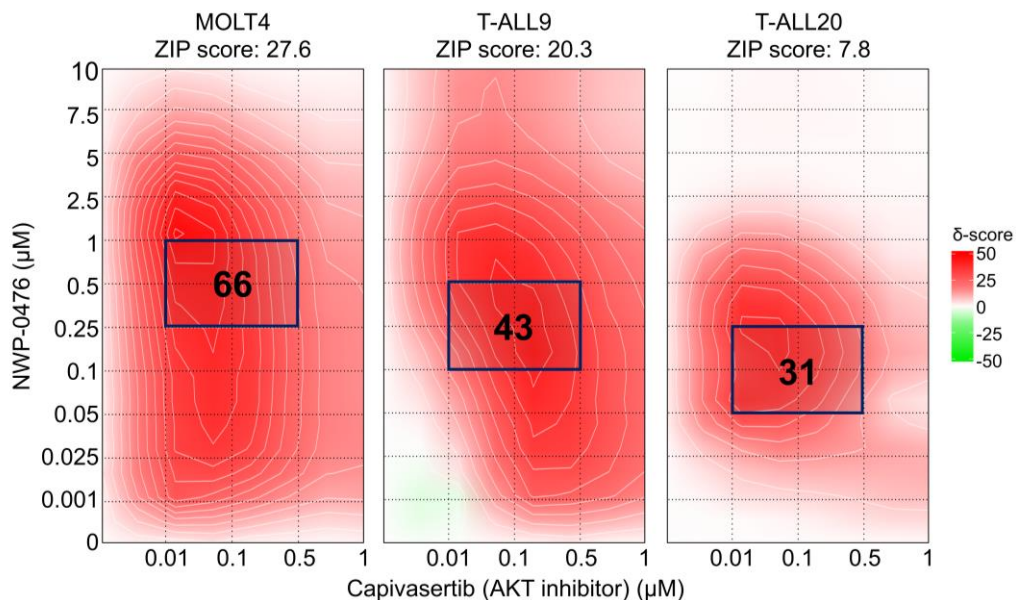

**(A)** Immunoblot showing ACK1 knockdown (KD) in MOLT16 T-ALL cell line, using two non-overlapping shRNA constructs. **(B)** Curves showing viability of MOLT16 non-targeting (NT) control and ACK1 KD cells treated with BH3 mimetics. **(C, D)** Tables showing  $\text{IC}_{50}$  values and their 95% confidence intervals (CI) for MOLT4 and MOLT16 NT control and ACK1 KD cells treated with BH3 mimetics. Experiments were done in triplicates. **(E)** Curves showing viability of MOLT4 NT control and ACK1 KD cells treated with capivasertib. **(F)** ZIP synergy plots for MOLT4 cell line and T-ALL primary cells treated with NWP-0476 and capivasertib. . \* $p < 0.05$ , \*\* $p < 0.01$ , \*\*\* $p < 0.001$

# Supplementary Figure 7

**A**

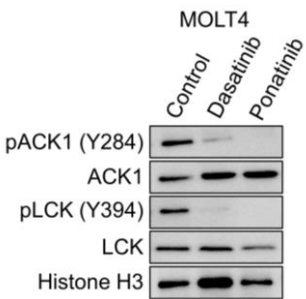

**B**

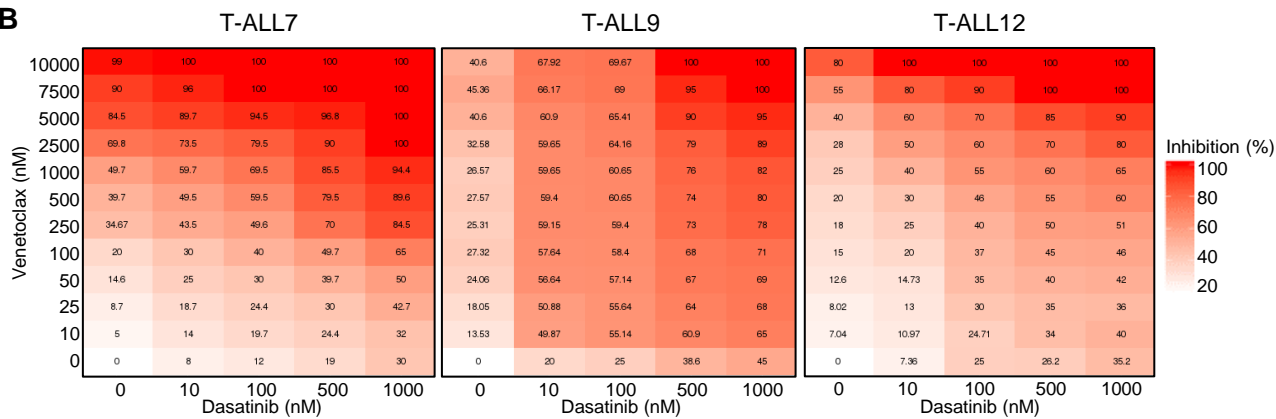

**C**

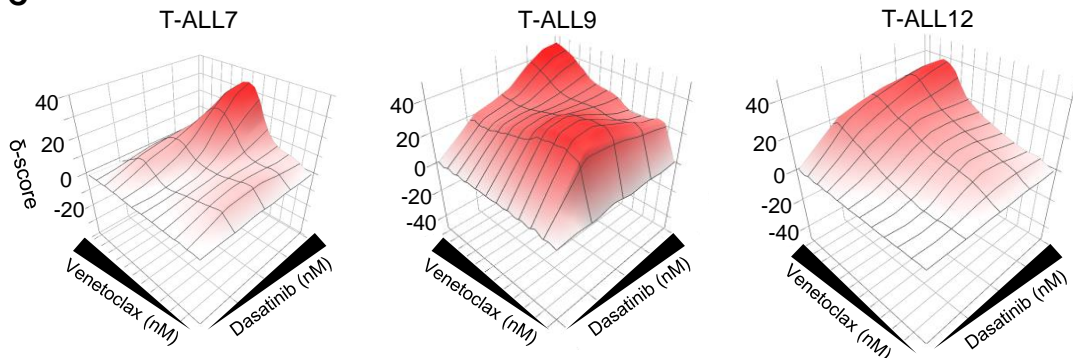

**E**

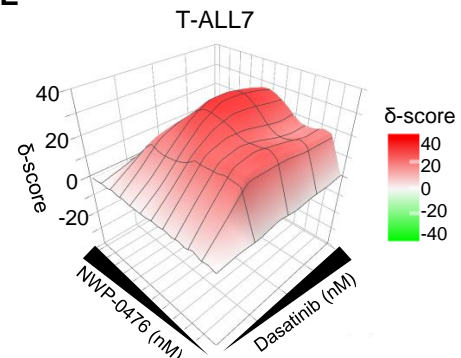

**D**

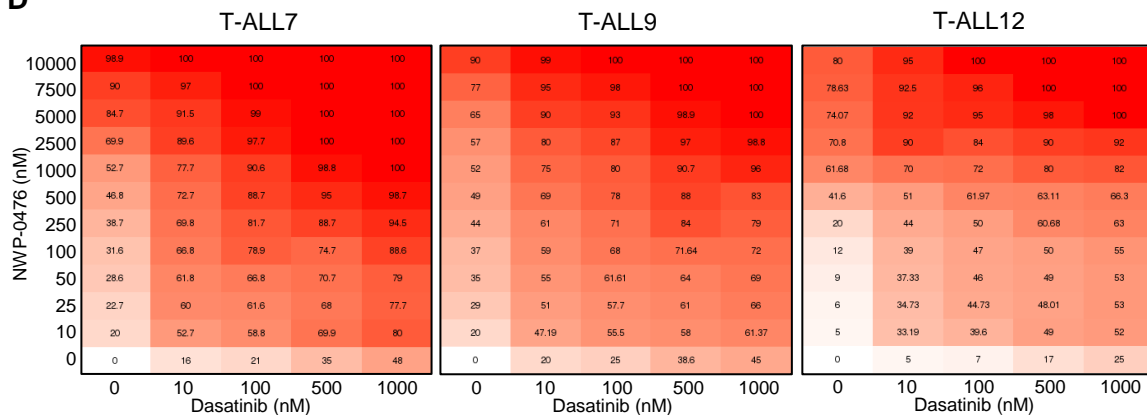

**F**

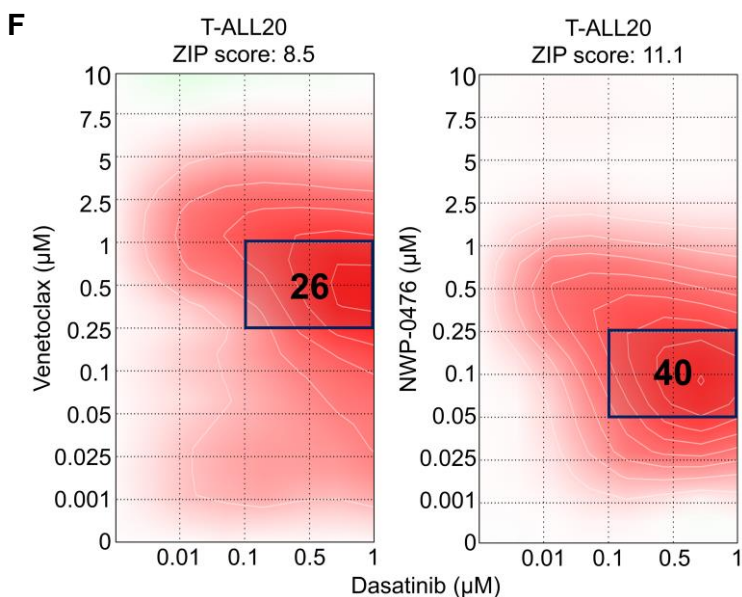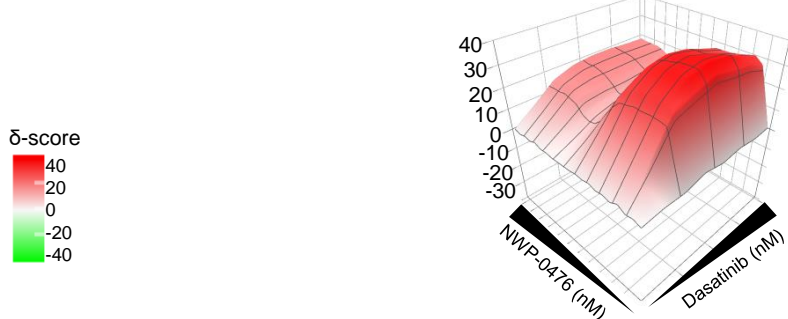

**(A)** Immunoblot showing changes in pACK1 and pLCK levels in MOLT4 T-ALL cells after 24-hours of treatment with dasatinib or ponatinib at 0.5  $\mu\text{M}$  dose. **(B, D)** Tables showing percent death of T-ALL primary cells treated with combinations of BH3 mimetics and dasatinib. **(C, E, F)** ZIP synergy plots of T-ALL primary cells treated with BH3 mimetics and dasatinib.

**Supplementary Figure 8**

**A**

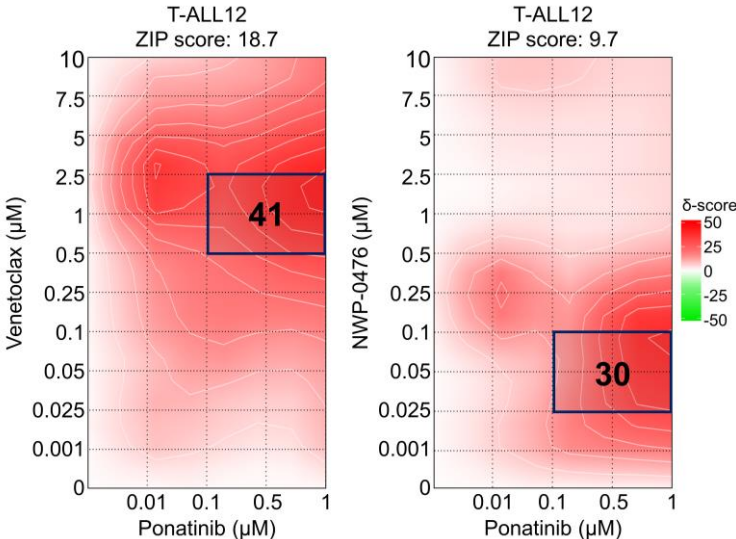

**B**

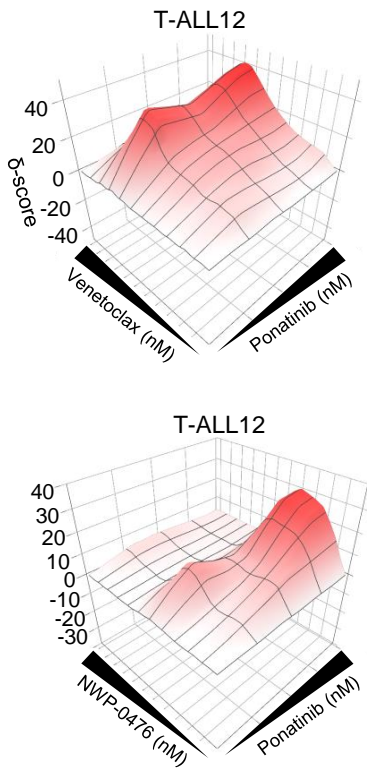

**C**

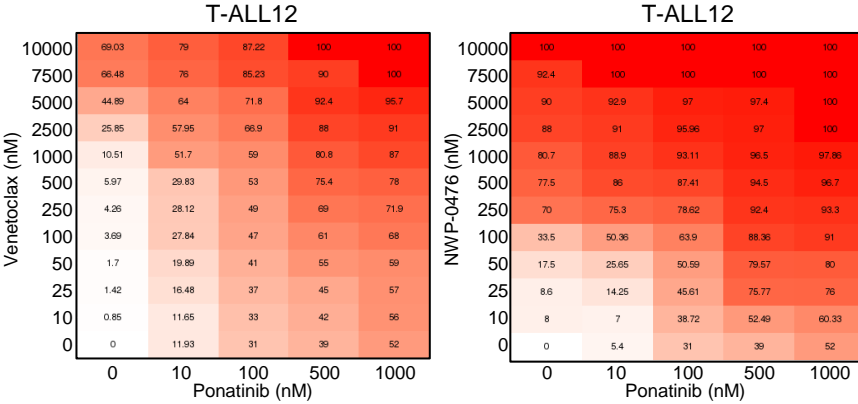

**(A, B)** ZIP synergy plots of T-ALL primary cells treated with BH3 mimetics and ponatinib. **(C)** Tables showing percent death of T-ALL primary cells treated with combinations of BH3 mimetics and ponatinib.



# Supplementary Figure 9

A

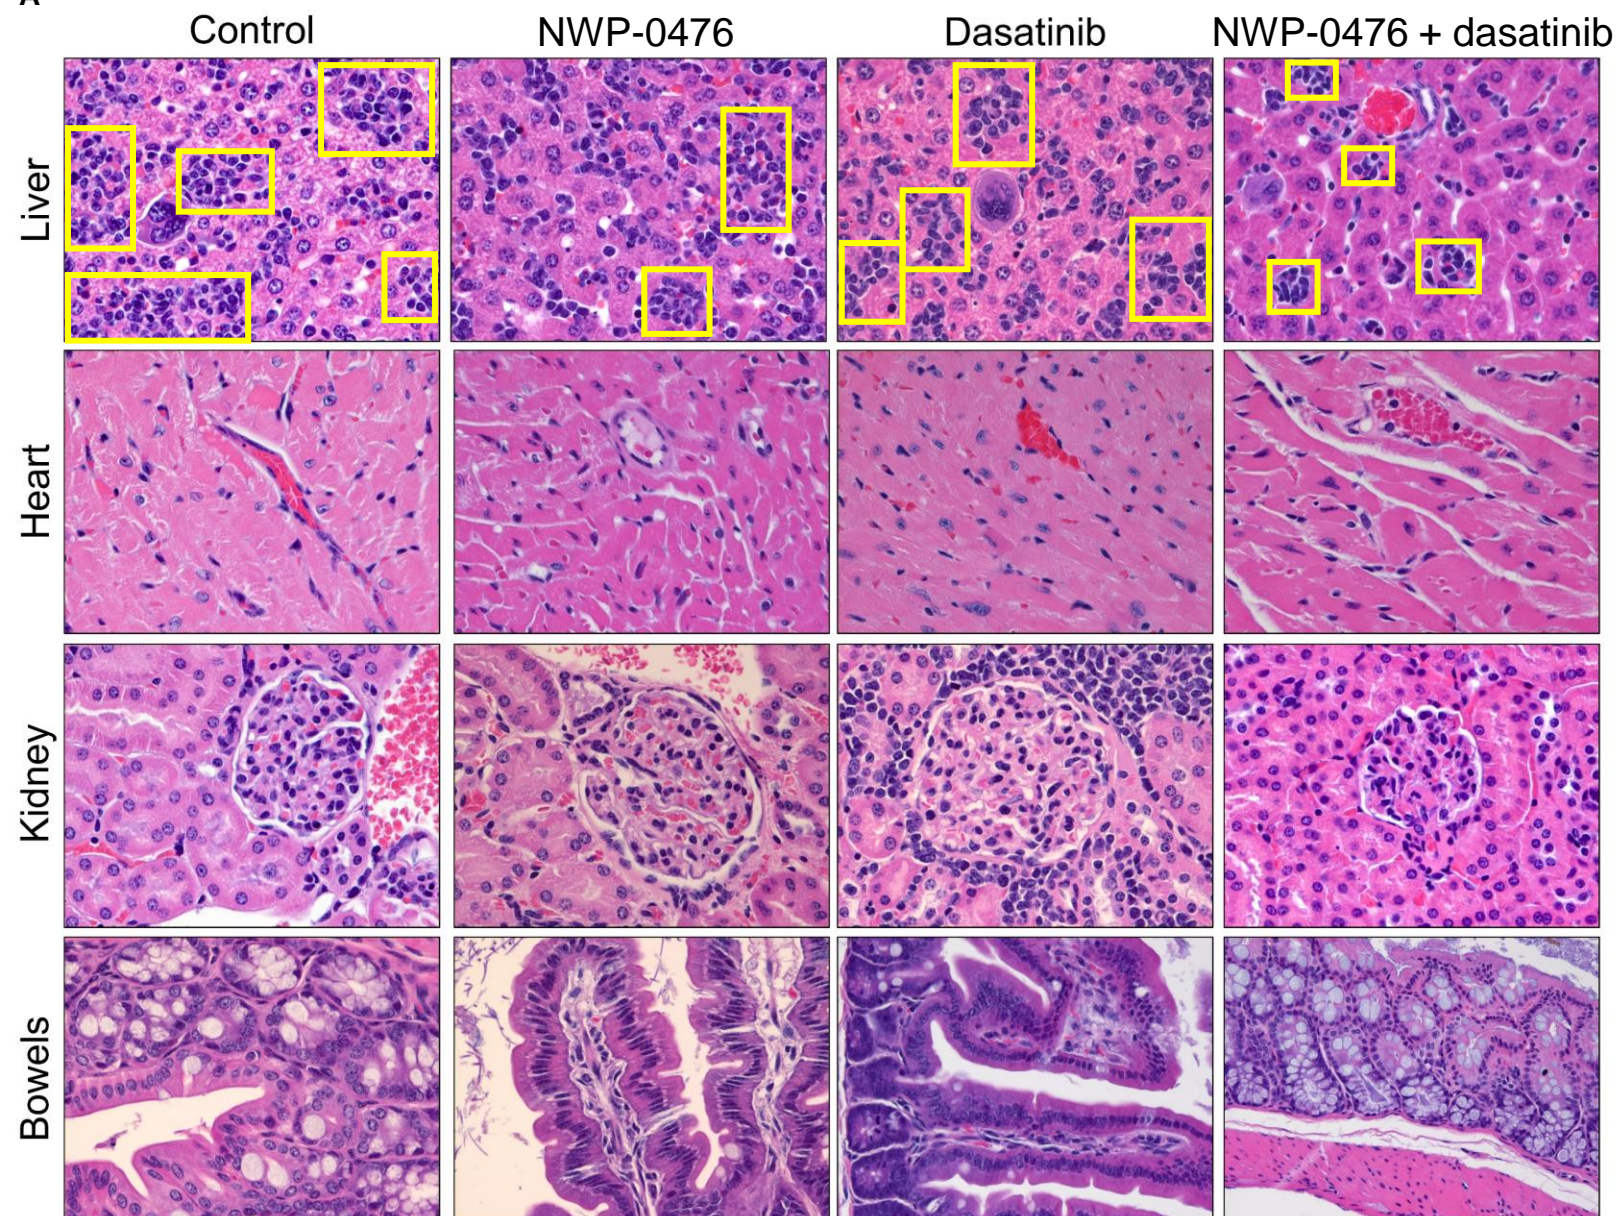

**(A)** Histopathologic examination of organs (liver, heart, kidney and bowels) from T-ALL PDX-engrafted NSG mice treated with vehicle control, NWP-0476, dasatinib, and NWP-0476 + dasatinib. Squares in liver images highlight the leukemic cell infiltrates.
